# Supplementary material for: Long-term severe hypoxia adaptation induces non-canonical EMT and a novel Wilms Tumor 1 (WT1) isoform.
Source: Research Square preprint supplement (doi:10.21203/rs.3.rs-3318128/v1), 2023-09-22
Supplement: Supplementary file 1 [file HIF1a-ChIPqPCR data.xlsx]

## Sheet: n1
Well Position	Sample Name	Target Name	CT
E1	HV2 0.5%O236hrs input 1in5	Car9	25.9426
E2	HV2 0.5%O236hrs input 1in5	Car9	26.0215
E3	HV2 0.5%O236hrs input 1in5	Car9	25.916
E4	HV2 0.5%O236hrs input 1in5	Vefga	27.2543
E5	HV2 0.5%O236hrs input 1in5	Vefga	28.484
E6	HV2 0.5%O236hrs input 1in5	Vefga	28.606
E7	HV2 0.5%O236hrs input 1in5	Fyn_neg	26.0457
E8	HV2 0.5%O236hrs input 1in5	Fyn_neg	25.9688
E9	HV2 0.5%O236hrs input 1in5	Fyn_neg	25.9346
E10	HV2 0.5%O236hrs input 1in5	HRE 3.5kb 1	24.9115
E11	HV2 0.5%O236hrs input 1in5	HRE 3.5kb 1	24.9329
E12	HV2 0.5%O236hrs input 1in5	HRE 3.5kb 1	24.8332
E13	HV2 0.5%O236hrs input 1in5	HRE 3.5kb 2	23.0661
E14	HV2 0.5%O236hrs input 1in5	HRE 3.5kb 2	22.4851
E15	HV2 0.5%O236hrs input 1in5	HRE 3.5kb 2	23.1762
E16	HV2 0.5%O236hrs input 1in5	HRE 7361	19.7369
E17	HV2 0.5%O236hrs input 1in5	HRE 7361	19.6217
E18	HV2 0.5%O236hrs input 1in5	HRE 7361	19.7447
E19	HV2 0.5%O236hrs input 1in5	HRE 7995	27.9672
E20	HV2 0.5%O236hrs input 1in5	HRE 7995	28.1485
E21	HV2 0.5%O236hrs input 1in5	HRE 7995	28.2851
E22	HV2 0.5%O236hrs input 1in5	HRE 12.5kb	24.4843
E23	HV2 0.5%O236hrs input 1in5	HRE 12.5kb	24.5564
E24	HV2 0.5%O236hrs input 1in5	HRE 12.5kb	24.5375
F1	HV2 0.5%O236hrs elute 1in5	Car9	31.8417
F2	HV2 0.5%O236hrs elute 1in5	Car9	31.9559
F3	HV2 0.5%O236hrs elute 1in5	Car9	31.8837
F4	HV2 0.5%O236hrs elute 1in5	Vefga	31.2161
F5	HV2 0.5%O236hrs elute 1in5	Vefga	30.7161
F6	HV2 0.5%O236hrs elute 1in5	Vefga	30.7045
F7	HV2 0.5%O236hrs elute 1in5	Fyn_neg	33.0351
F8	HV2 0.5%O236hrs elute 1in5	Fyn_neg	34.298
F9	HV2 0.5%O236hrs elute 1in5	Fyn_neg	33.2976
F10	HV2 0.5%O236hrs elute 1in5	HRE 3.5kb 1	28.7038
F11	HV2 0.5%O236hrs elute 1in5	HRE 3.5kb 1	29.6698
F12	HV2 0.5%O236hrs elute 1in5	HRE 3.5kb 1	28.8161
F13	HV2 0.5%O236hrs elute 1in5	HRE 3.5kb 2	23.4724
F14	HV2 0.5%O236hrs elute 1in5	HRE 3.5kb 2	23.7507
F15	HV2 0.5%O236hrs elute 1in5	HRE 3.5kb 2	23.7569
F16	HV2 0.5%O236hrs elute 1in5	HRE 7361	25.4919
F17	HV2 0.5%O236hrs elute 1in5	HRE 7361	25.6187
F18	HV2 0.5%O236hrs elute 1in5	HRE 7361	25.3748
F19	HV2 0.5%O236hrs elute 1in5	HRE 7995	31.1478
F20	HV2 0.5%O236hrs elute 1in5	HRE 7995	31.123
F21	HV2 0.5%O236hrs elute 1in5	HRE 7995	31.1103
F22	HV2 0.5%O236hrs elute 1in5	HRE 12.5kb	28.7857
F23	HV2 0.5%O236hrs elute 1in5	HRE 12.5kb	28.4053
F24	HV2 0.5%O236hrs elute 1in5	HRE 12.5kb	28.1138
K1	HV2 0.5%O236hrs input 1in5	HRE 16kb	25.9771
K2	HV2 0.5%O236hrs input 1in5	HRE 16kb	26.0177
K3	HV2 0.5%O236hrs input 1in5	HRE 16kb	26.0937
K4	HV2 0.5%O236hrs input 1in5	HRE 18kb	25.5537
K5	HV2 0.5%O236hrs input 1in5	HRE 18kb	25.6704
K6	HV2 0.5%O236hrs input 1in5	HRE 18kb	25.5992
L1	HV2 0.5%O236hrs elute 1in5	HRE 16kb	32.6838
L2	HV2 0.5%O236hrs elute 1in5	HRE 16kb	32.3389
L3	HV2 0.5%O236hrs elute 1in5	HRE 16kb	32.4429
L4	HV2 0.5%O236hrs elute 1in5	HRE 18kb	31.4681
L5	HV2 0.5%O236hrs elute 1in5	HRE 18kb	31.728
L6	HV2 0.5%O236hrs elute 1in5	HRE 18kb	31.5786

## Sheet: n2
Well Position	Sample Name	Target Name	CT
K7	HV2 0.5% O2 36hrs n2 input 1in5	Car9	25.6416
K8	HV2 0.5% O2 36hrs n2 input 1in5	Car9	25.7719
K9	HV2 0.5% O2 36hrs n2 input 1in5	Car9	25.7147
K10	HV2 0.5% O2 36hrs n2 input 1in5	Vegfa	27.6521
K11	HV2 0.5% O2 36hrs n2 input 1in5	Vegfa	27.9883
K12	HV2 0.5% O2 36hrs n2 input 1in5	Vegfa	27.9419
K13	HV2 0.5% O2 36hrs n2 input 1in5	Fyn_neg	27.3278
K14	HV2 0.5% O2 36hrs n2 input 1in5	Fyn_neg	27.1212
K15	HV2 0.5% O2 36hrs n2 input 1in5	Fyn_neg	28.0294
K16	HV2 0.5% O2 36hrs n2 input 1in5	HRE 3.5kb 1	24.844
K17	HV2 0.5% O2 36hrs n2 input 1in5	HRE 3.5kb 1	24.9728
K18	HV2 0.5% O2 36hrs n2 input 1in5	HRE 3.5kb 1	24.7979
K19	HV2 0.5% O2 36hrs n2 input 1in5	HRE 3.5kb 2	20.3467
K20	HV2 0.5% O2 36hrs n2 input 1in5	HRE 3.5kb 2	21.0798
K21	HV2 0.5% O2 36hrs n2 input 1in5	HRE 3.5kb 2	21.2482
L7	HV2 0.5% O2 36hrs n2 elute 1in5	Car9	30.7455
L8	HV2 0.5% O2 36hrs n2 elute 1in5	Car9	31.1988
L9	HV2 0.5% O2 36hrs n2 elute 1in5	Car9	30.8343
L10	HV2 0.5% O2 36hrs n2 elute 1in5	Vegfa	28.2847
L11	HV2 0.5% O2 36hrs n2 elute 1in5	Vegfa	27.8656
L12	HV2 0.5% O2 36hrs n2 elute 1in5	Vegfa	28.2164
L13	HV2 0.5% O2 36hrs n2 elute 1in5	Fyn_neg	34.9649
L14	HV2 0.5% O2 36hrs n2 elute 1in5	Fyn_neg	34.5127
L15	HV2 0.5% O2 36hrs n2 elute 1in5	Fyn_neg	34.0599
L16	HV2 0.5% O2 36hrs n2 elute 1in5	HRE 3.5kb 1	28.943
L17	HV2 0.5% O2 36hrs n2 elute 1in5	HRE 3.5kb 1	28.3825
L18	HV2 0.5% O2 36hrs n2 elute 1in5	HRE 3.5kb 1	28.794
L19	HV2 0.5% O2 36hrs n2 elute 1in5	HRE 3.5kb 2	21.3589
L20	HV2 0.5% O2 36hrs n2 elute 1in5	HRE 3.5kb 2	21.1472
L21	HV2 0.5% O2 36hrs n2 elute 1in5	HRE 3.5kb 2	21.0651
M7	HV2 0.5% O2 36hrs n1 elute 1in5	Car9	30.2778
M8	HV2 0.5% O2 36hrs n1 elute 1in5	Car9	30.6052
M9	HV2 0.5% O2 36hrs n1 elute 1in5	Car9	30.9359
M10	HV2 0.5% O2 36hrs n1 elute 1in5	Vegfa	28.4022
M11	HV2 0.5% O2 36hrs n1 elute 1in5	Vegfa	28.4044
M12	HV2 0.5% O2 36hrs n1 elute 1in5	Vegfa	28.351
M13	HV2 0.5% O2 36hrs n1 elute 1in5	Fyn_neg	34.4079
M14	HV2 0.5% O2 36hrs n1 elute 1in5	Fyn_neg	35.4299
M15	HV2 0.5% O2 36hrs n1 elute 1in5	Fyn_neg	33.5254
M16	HV2 0.5% O2 36hrs n1 elute 1in5	HRE 3.5kb 1	28.5966
M17	HV2 0.5% O2 36hrs n1 elute 1in5	HRE 3.5kb 1	28.3904
M18	HV2 0.5% O2 36hrs n1 elute 1in5	HRE 3.5kb 1	28.5502
M19	HV2 0.5% O2 36hrs n1 elute 1in5	HRE 3.5kb 2	20.9033
M20	HV2 0.5% O2 36hrs n1 elute 1in5	HRE 3.5kb 2	21.2326
M21	HV2 0.5% O2 36hrs n1 elute 1in5	HRE 3.5kb 2	20.4659
N7	HV2 0.5% O2 36hrs n2 input 1in5	HRE 7361	20.3517
N8	HV2 0.5% O2 36hrs n2 input 1in5	HRE 7361	20.2268
N9	HV2 0.5% O2 36hrs n2 input 1in5	HRE 7361	20.6551
N10	HV2 0.5% O2 36hrs n2 input 1in5	HRE 7995	27.9231
N11	HV2 0.5% O2 36hrs n2 input 1in5	HRE 7995	27.5272
N12	HV2 0.5% O2 36hrs n2 input 1in5	HRE 7995	27.9001
N13	HV2 0.5% O2 36hrs n2 input 1in5	HRE 12.5kb	25.4655
N14	HV2 0.5% O2 36hrs n2 input 1in5	HRE 12.5kb	25.3133
N15	HV2 0.5% O2 36hrs n2 input 1in5	HRE 12.5kb	25.4404
N16	HV2 0.5% O2 36hrs n2 input 1in5	HRE 16kb	26.3998
N17	HV2 0.5% O2 36hrs n2 input 1in5	HRE 16kb	26.2754
N18	HV2 0.5% O2 36hrs n2 input 1in5	HRE 16kb	26.3489
N19	HV2 0.5% O2 36hrs n2 input 1in5	HREs 18kb	26.497
N20	HV2 0.5% O2 36hrs n2 input 1in5	HREs 18kb	26.4553
N21	HV2 0.5% O2 36hrs n2 input 1in5	HREs 18kb	26.5832
O7	HV2 0.5% O2 36hrs n2 elute 1in5	HRE 7361	26.5442
O8	HV2 0.5% O2 36hrs n2 elute 1in5	HRE 7361	26.1021
O9	HV2 0.5% O2 36hrs n2 elute 1in5	HRE 7361	26.3855
O10	HV2 0.5% O2 36hrs n2 elute 1in5	HRE 7995	29.6381
O11	HV2 0.5% O2 36hrs n2 elute 1in5	HRE 7995	30.2362
O12	HV2 0.5% O2 36hrs n2 elute 1in5	HRE 7995	30.4417
O13	HV2 0.5% O2 36hrs n2 elute 1in5	HRE 12.5kb	27.9422
O14	HV2 0.5% O2 36hrs n2 elute 1in5	HRE 12.5kb	27.5396
O15	HV2 0.5% O2 36hrs n2 elute 1in5	HRE 12.5kb	28.1482
O16	HV2 0.5% O2 36hrs n2 elute 1in5	HRE 16kb	36.1346
O17	HV2 0.5% O2 36hrs n2 elute 1in5	HRE 16kb	34.4938
O18	HV2 0.5% O2 36hrs n2 elute 1in5	HRE 16kb	34.8837
O19	HV2 0.5% O2 36hrs n2 elute 1in5	HREs 18kb	33.3531
O20	HV2 0.5% O2 36hrs n2 elute 1in5	HREs 18kb	34.9079
O21	HV2 0.5% O2 36hrs n2 elute 1in5	HREs 18kb	34.2015
P7	HV2 0.5% O2 36hrs n1 elute 1in5	HRE 7361	26.9235
P8	HV2 0.5% O2 36hrs n1 elute 1in5	HRE 7361	26.7325
P9	HV2 0.5% O2 36hrs n1 elute 1in5	HRE 7361	26.8296
P10	HV2 0.5% O2 36hrs n1 elute 1in5	HRE 7995	29.9226
P11	HV2 0.5% O2 36hrs n1 elute 1in5	HRE 7995	29.8936
P12	HV2 0.5% O2 36hrs n1 elute 1in5	HRE 7995	30.018
P13	HV2 0.5% O2 36hrs n1 elute 1in5	HRE 12.5kb	27.8635
P14	HV2 0.5% O2 36hrs n1 elute 1in5	HRE 12.5kb	27.5882
P15	HV2 0.5% O2 36hrs n1 elute 1in5	HRE 12.5kb	27.6354
P16	HV2 0.5% O2 36hrs n1 elute 1in5	HRE 16kb	35.831
P17	HV2 0.5% O2 36hrs n1 elute 1in5	HRE 16kb	33.461
P18	HV2 0.5% O2 36hrs n1 elute 1in5	HRE 16kb	Undetermined
P19	HV2 0.5% O2 36hrs n1 elute 1in5	HREs 18kb	34.222
P20	HV2 0.5% O2 36hrs n1 elute 1in5	HREs 18kb	34.0663
P21	HV2 0.5% O2 36hrs n1 elute 1in5	HREs 18kb	33.3596

## Sheet: n3
Well Position	Sample Name	Target Name	CT
I13	HV2 0.5%O2 36hrs n3 input 1in5	Car9	26.9535
I14	HV2 0.5%O2 36hrs n3 input 1in5	Car9	26.8142
I15	HV2 0.5%O2 36hrs n3 input 1in5	Car9	26.591
I16	HV2 0.5%O2 36hrs n3 input 1in5	Vegfa	30.2593
I17	HV2 0.5%O2 36hrs n3 input 1in5	Vegfa	30.1774
I18	HV2 0.5%O2 36hrs n3 input 1in5	Vegfa	29.8997
I19	HV2 0.5%O2 36hrs n3 input 1in5	Fyn_neg	27.8719
I20	HV2 0.5%O2 36hrs n3 input 1in5	Fyn_neg	27.3894
I21	HV2 0.5%O2 36hrs n3 input 1in5	Fyn_neg	27.4026
I22	HV2 0.5%O2 36hrs n3 input 1in5	HRE 3.5kb 1	26.4672
I23	HV2 0.5%O2 36hrs n3 input 1in5	HRE 3.5kb 1	26.1974
I24	HV2 0.5%O2 36hrs n3 input 1in5	HRE 3.5kb 1	26.6769
J13	HV2 0.5%O2 36hrs n3 elute 1in5	Car9	33.3316
J14	HV2 0.5%O2 36hrs n3 elute 1in5	Car9	32.0534
J15	HV2 0.5%O2 36hrs n3 elute 1in5	Car9	31.0365
J16	HV2 0.5%O2 36hrs n3 elute 1in5	Vegfa	32.978
J17	HV2 0.5%O2 36hrs n3 elute 1in5	Vegfa	32.4726
J18	HV2 0.5%O2 36hrs n3 elute 1in5	Vegfa	31.4647
J19	HV2 0.5%O2 36hrs n3 elute 1in5	Fyn_neg	37.5267
J20	HV2 0.5%O2 36hrs n3 elute 1in5	Fyn_neg	36.5544
J21	HV2 0.5%O2 36hrs n3 elute 1in5	Fyn_neg	38.536
J22	HV2 0.5%O2 36hrs n3 elute 1in5	HRE 3.5kb 1	32.2699
J23	HV2 0.5%O2 36hrs n3 elute 1in5	HRE 3.5kb 1	31.1921
J24	HV2 0.5%O2 36hrs n3 elute 1in5	HRE 3.5kb 1	31.3587
O1	HV2 0.5%O2 36hrs n3 input 1in5	HRE 3.5kb 2	23.4463
O2	HV2 0.5%O2 36hrs n3 input 1in5	HRE 3.5kb 2	23.2197
O3	HV2 0.5%O2 36hrs n3 input 1in5	HRE 3.5kb 2	23.5423
O4	HV2 0.5%O2 36hrs n3 input 1in5	HRE 7361	21.9454
O5	HV2 0.5%O2 36hrs n3 input 1in5	HRE 7361	21.7297
O6	HV2 0.5%O2 36hrs n3 input 1in5	HRE 7361	21.7289
O7	HV2 0.5%O2 36hrs n3 input 1in5	HRE7995	29.1859
O8	HV2 0.5%O2 36hrs n3 input 1in5	HRE7995	28.9
O9	HV2 0.5%O2 36hrs n3 input 1in5	HRE7995	28.8164
O10	HV2 0.5%O2 36hrs n3 input 1in5	HRE 12.5kb	26.1129
O11	HV2 0.5%O2 36hrs n3 input 1in5	HRE 12.5kb	25.5853
O12	HV2 0.5%O2 36hrs n3 input 1in5	HRE 12.5kb	26.1164
O13	HV2 0.5%O2 36hrs n3 input 1in5	HRE 16kb	27.6235
O14	HV2 0.5%O2 36hrs n3 input 1in5	HRE 16kb	27.5794
O15	HV2 0.5%O2 36hrs n3 input 1in5	HRE 16kb	27.5868
O16	HV2 0.5%O2 36hrs n3 input 1in5	HREs 18kb	27.0457
O17	HV2 0.5%O2 36hrs n3 input 1in5	HREs 18kb	26.9822
O18	HV2 0.5%O2 36hrs n3 input 1in5	HREs 18kb	27.0558
P1	HV2 0.5%O2 36hrs n3 elute 1in5	HRE 3.5kb 2	23.6378
P2	HV2 0.5%O2 36hrs n3 elute 1in5	HRE 3.5kb 2	23.302
P3	HV2 0.5%O2 36hrs n3 elute 1in5	HRE 3.5kb 2	23.0984
P4	HV2 0.5%O2 36hrs n3 elute 1in5	HRE 7361	30.2203
P5	HV2 0.5%O2 36hrs n3 elute 1in5	HRE 7361	30.0465
P6	HV2 0.5%O2 36hrs n3 elute 1in5	HRE 7361	29.4614
P7	HV2 0.5%O2 36hrs n3 elute 1in5	HRE7995	30.8606
P8	HV2 0.5%O2 36hrs n3 elute 1in5	HRE7995	31.3265
P9	HV2 0.5%O2 36hrs n3 elute 1in5	HRE7995	30.8581
P10	HV2 0.5%O2 36hrs n3 elute 1in5	HRE 12.5kb	29.3158
P11	HV2 0.5%O2 36hrs n3 elute 1in5	HRE 12.5kb	28.9106
P12	HV2 0.5%O2 36hrs n3 elute 1in5	HRE 12.5kb	28.4603
P13	HV2 0.5%O2 36hrs n3 elute 1in5	HRE 16kb	33.1429
P14	HV2 0.5%O2 36hrs n3 elute 1in5	HRE 16kb	33.3001
P15	HV2 0.5%O2 36hrs n3 elute 1in5	HRE 16kb	34.343
P16	HV2 0.5%O2 36hrs n3 elute 1in5	HREs 18kb	34.8614
P17	HV2 0.5%O2 36hrs n3 elute 1in5	HREs 18kb	35.958
P18	HV2 0.5%O2 36hrs n3 elute 1in5	HREs 18kb	34.9025
